# Supplementary material for: Disruption of lipid metabolism to induce ferroptosis using multifunctional fibrate-Pt(iv) prodrugs for cancer treatment
Source: Royal Society of Chemistry journal article supplement (doi:10.1039/d4qi00386a), 2024-01-01
Supplement: d4qi00386a1.pdf [file d4qi00386a1.pdf]

## **Disruption of lipid metabolism to induce ferroptosis by multifunctional fibrate-Pt(IV) prodrugs for cancer treatment**

**Peng Sun<sup>a,1</sup>, Jia-Qian Wang<sup>a,1</sup>, Qiang Xie<sup>a</sup>, Xuan-Lin Ren<sup>a</sup>, Xin Qiao<sup>a,\*</sup>, Jing-Yuan Xu<sup>a,b,\*</sup>**

*<sup>a</sup>Department of Chemical Biology, School of Pharmacy, Tianjin Medical University, Tianjin 300070, China.*

*<sup>b</sup>Key Laboratory of Immune Microenvironment and Disease of the Ministry of Education, Tianjin Medical University, Tianjin 300070, China.*

\*Corresponding author:

*E-mail address:* qiaoxin@tmu.edu.cn (X. Qiao), xujingyuan@tmu.edu.cn (Prof. J.-Y. Xu)

<sup>1</sup>These authors contributed equally to this work.

## Table of Contents

|                                                                                                                       |    |
|-----------------------------------------------------------------------------------------------------------------------|----|
| Fig. S1. <sup>1</sup> H-NMR spectrum of compound <b>1</b> in DMSO- <i>d</i> <sub>6</sub> .....                        | 2  |
| Fig. S2. <sup>13</sup> C-NMR spectrum of compound <b>1</b> in DMSO- <i>d</i> <sub>6</sub> .....                       | 3  |
| Fig. S3. HR-MS spectrum of compound <b>1</b> . .....                                                                  | 4  |
| Fig. S4. Reverse-phase HPLC trace of compound <b>1</b> . .....                                                        | 5  |
| Fig. S5. <sup>1</sup> H-NMR spectrum of compound <b>2</b> in DMSO- <i>d</i> <sub>6</sub> .....                        | 6  |
| Fig. S6. <sup>13</sup> C-NMR spectrum of compound <b>2</b> in DMSO- <i>d</i> <sub>6</sub> .....                       | 7  |
| Fig. S7. HR-MS spectrum of compound <b>2</b> . .....                                                                  | 8  |
| Fig. S8. Reverse-phase HPLC trace of compound <b>2</b> . .....                                                        | 9  |
| Fig. S9. <sup>1</sup> H-NMR spectrum of compound <b>3</b> in DMSO- <i>d</i> <sub>6</sub> .....                        | 10 |
| Fig. S10. <sup>13</sup> C-NMR spectrum of compound <b>3</b> in DMSO- <i>d</i> <sub>6</sub> .....                      | 11 |
| Fig. S11. HR-MS spectrum of compound <b>3</b> .....                                                                   | 12 |
| Fig. S12. Reverse-phase HPLC trace of compound <b>3</b> . .....                                                       | 13 |
| Fig. S13. <sup>1</sup> H-NMR spectrum of compound <b>4</b> in DMSO- <i>d</i> <sub>6</sub> .....                       | 14 |
| Fig. S14. <sup>13</sup> C-NMR spectrum of compound <b>4</b> in DMSO- <i>d</i> <sub>6</sub> .....                      | 15 |
| Fig. S15. HR-MS spectrum of compound <b>4</b> . .....                                                                 | 16 |
| Fig. S16. Reverse-phase HPLC trace of compound <b>4</b> . .....                                                       | 17 |
| Fig. S17. Comparison of cell viability of A549 cells treated with different concentrations of compounds for 48 h..... | 18 |
| Fig. S18. Un-cropped western blotting images of Figure 8a. ....                                                       | 19 |
| Fig. S19. Un-cropped western blotting images of Figure 8c. ....                                                       | 20 |
| Fig. S20. Structure of <b>12C</b> and protein expression of A549 cells treated with 5 μM compounds for 24 h. ....     | 20 |

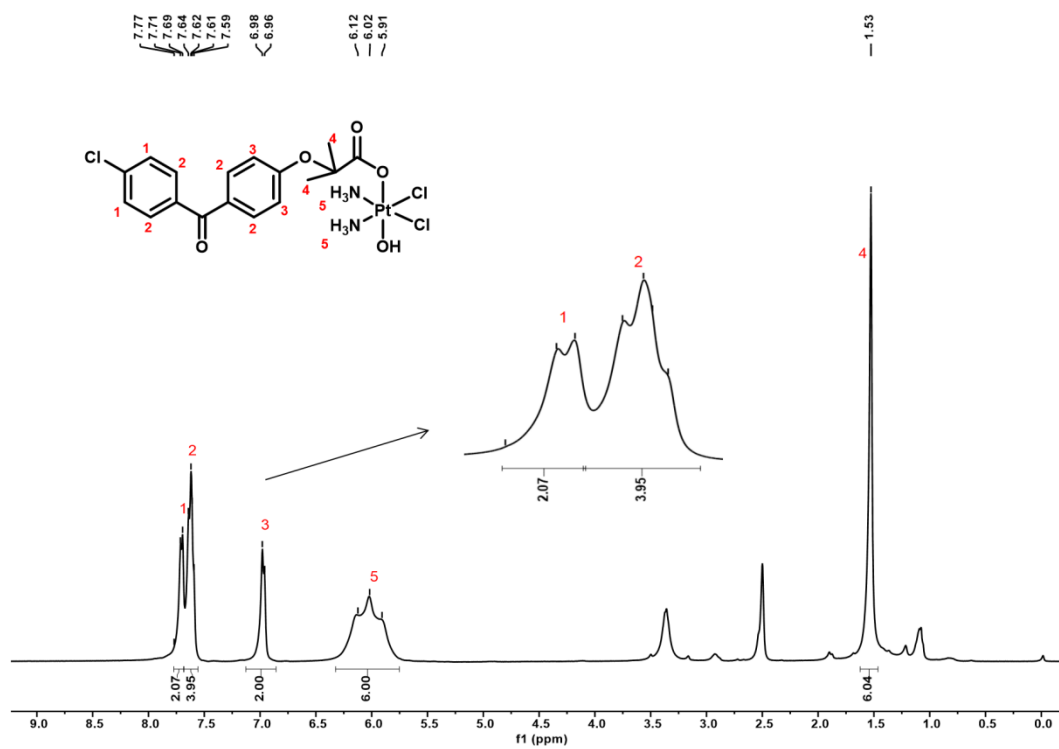

Fig. S1.  $^1\text{H-NMR}$  spectrum of compound **1** in  $\text{DMSO-}d_6$ .

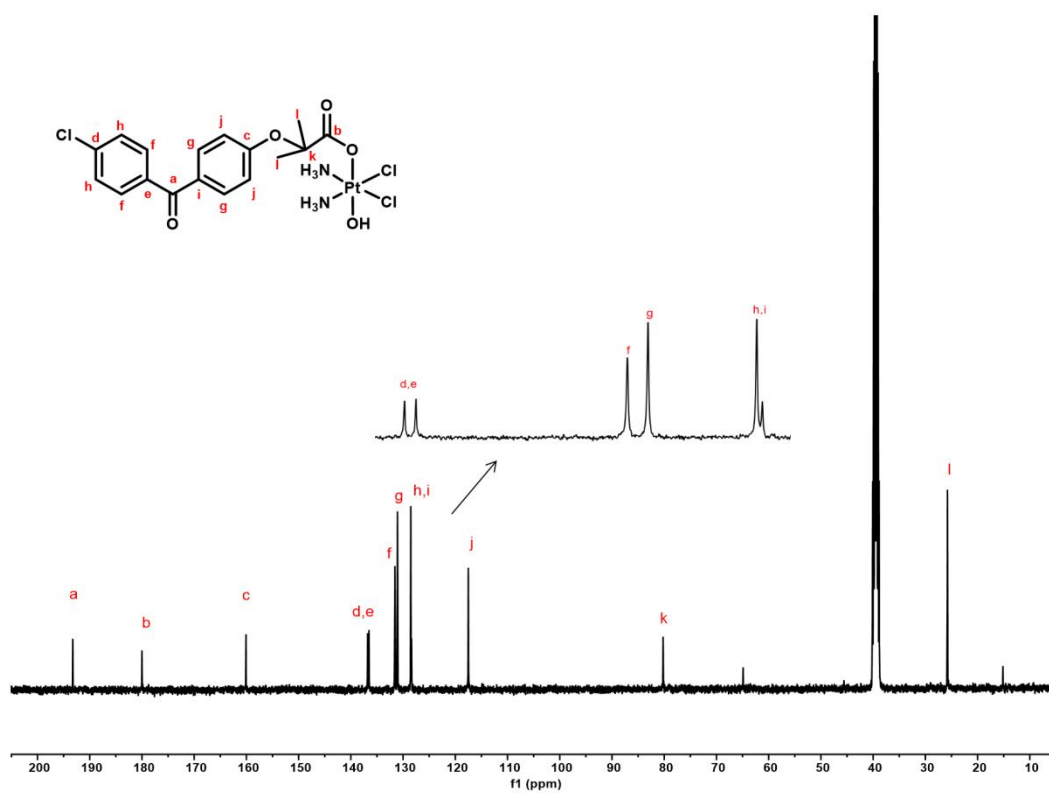

Fig. S2.  $^{13}\text{C}$ -NMR spectrum of compound 1 in  $\text{DMSO-}d_6$ .

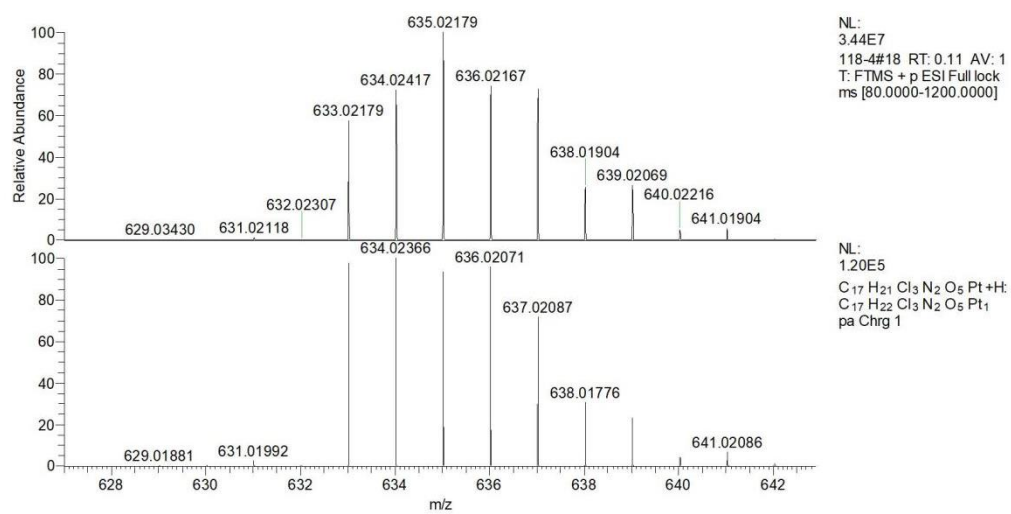

Fig. S3. HR-MS spectrum of compound 1.

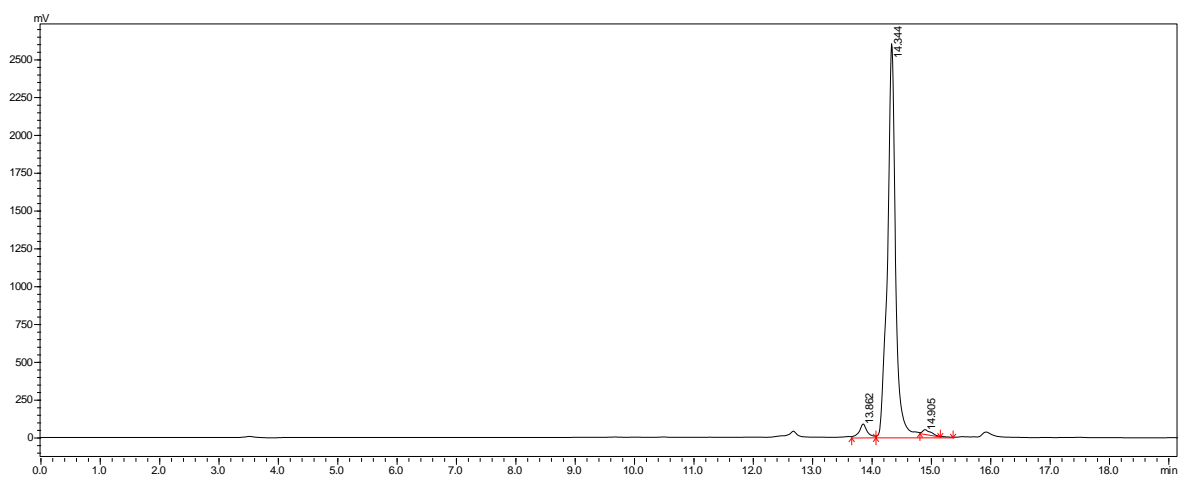

|              | <b>Retention</b> | <b>Peak area</b> | <b>Concentration</b> |
|--------------|------------------|------------------|----------------------|
| <b>1</b>     | <b>13.862</b>    | <b>787449</b>    | <b>3.049</b>         |
| <b>2</b>     | <b>14.344</b>    | <b>24787777</b>  | <b>95.985</b>        |
| <b>3</b>     | <b>14.905</b>    | <b>249446</b>    | <b>0.966</b>         |
| <b>Total</b> |                  | <b>25824673</b>  | <b>100.000</b>       |

Fig. S4. Reverse-phase HPLC trace of compound 1.

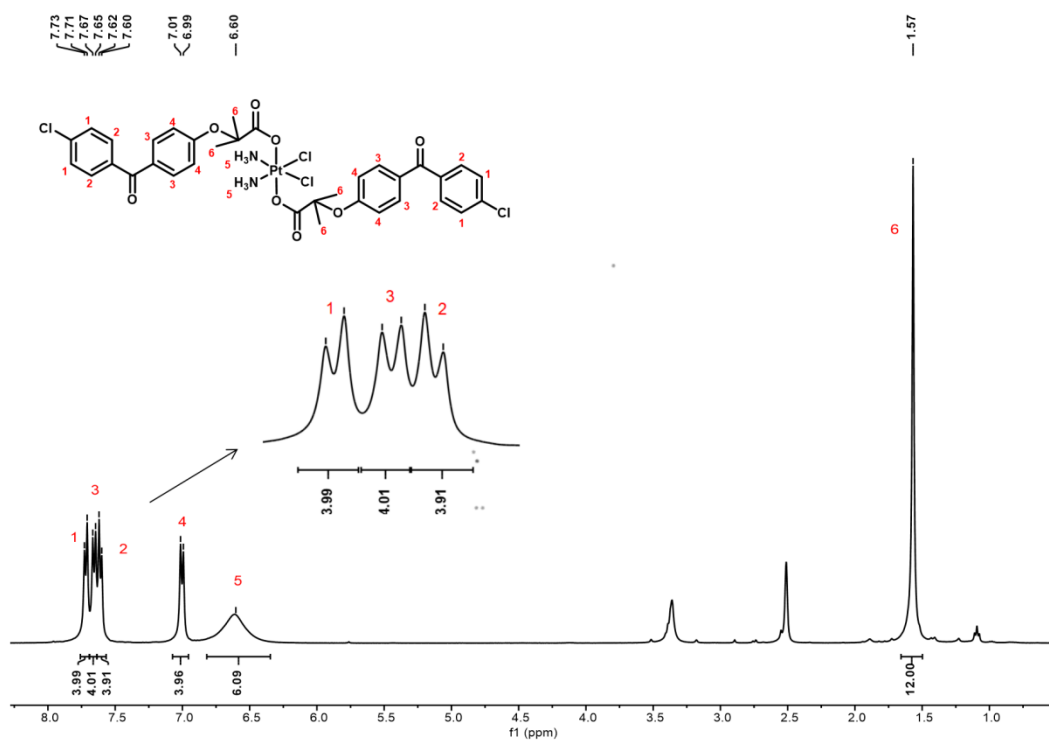

Fig. S5. <sup>1</sup>H-NMR spectrum of compound **2** in DMSO-*d*<sub>6</sub>.

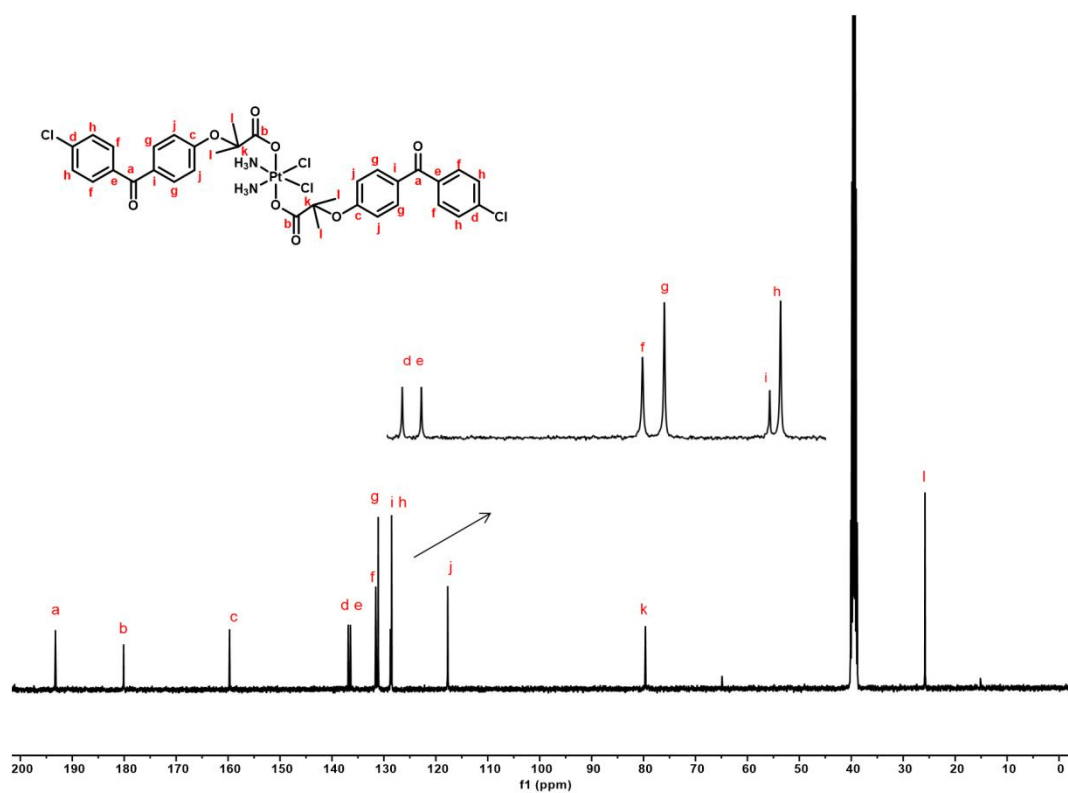

Fig. S6.  $^{13}\text{C}$ -NMR spectrum of compound **2** in  $\text{DMSO-}d_6$ .



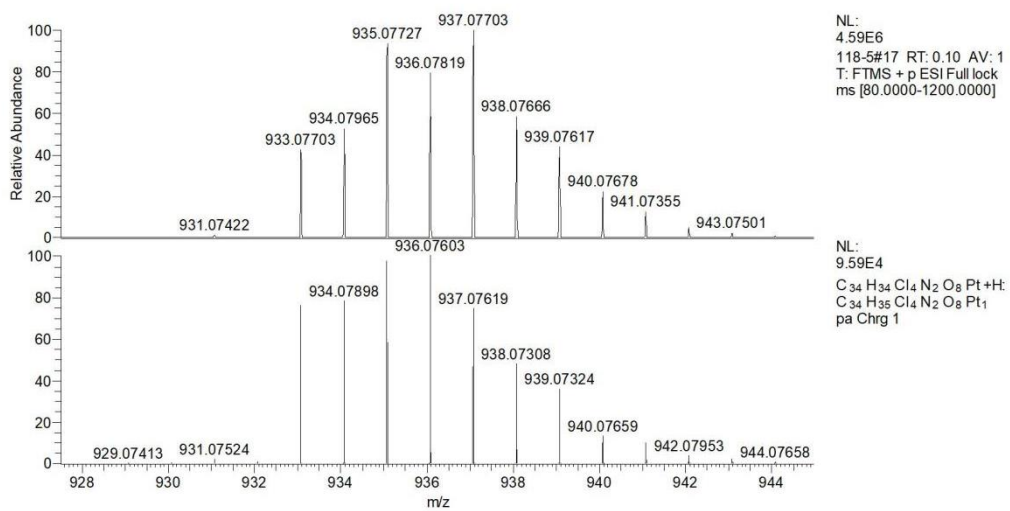

Fig. S7. HR-MS spectrum of compound 2.

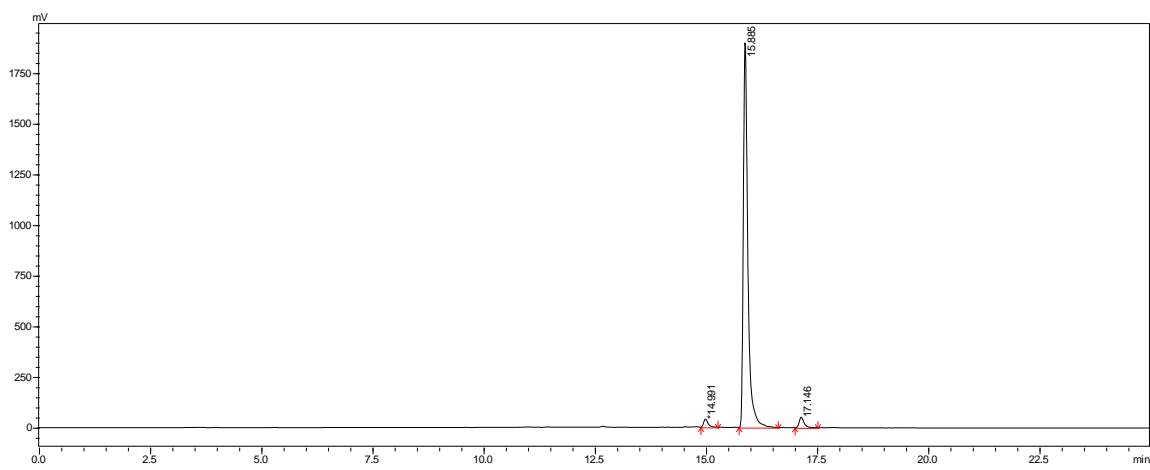

|              | <b>Retention</b> | <b>Peak area</b> | <b>Concentration</b> |
|--------------|------------------|------------------|----------------------|
| <b>1</b>     | <b>14.991</b>    | <b>401243</b>    | <b>1.523</b>         |
| <b>2</b>     | <b>15.885</b>    | <b>25384642</b>  | <b>96.376</b>        |
| <b>3</b>     | <b>17.146</b>    | <b>553216</b>    | <b>2.101</b>         |
| <b>Total</b> |                  | <b>26339101</b>  | <b>100.000</b>       |

Fig. S8. Reverse-phase HPLC trace of compound 2.

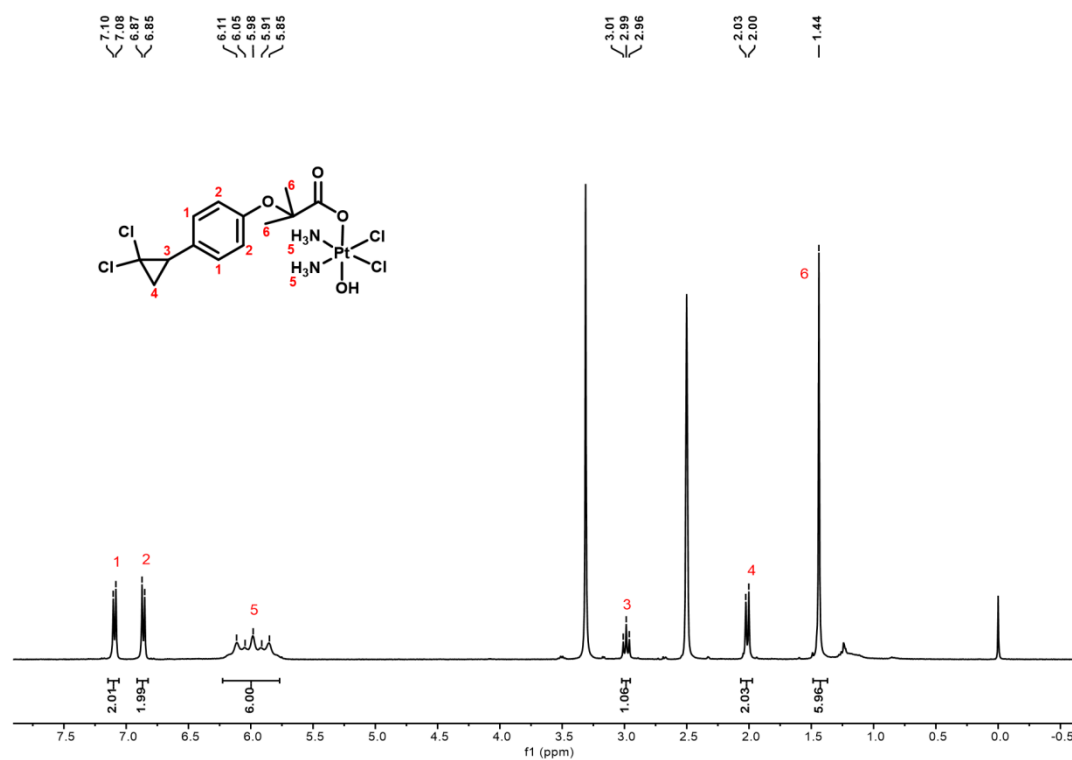

Fig. S9.  $^1\text{H-NMR}$  spectrum of compound **3** in  $\text{DMSO-}d_6$ .

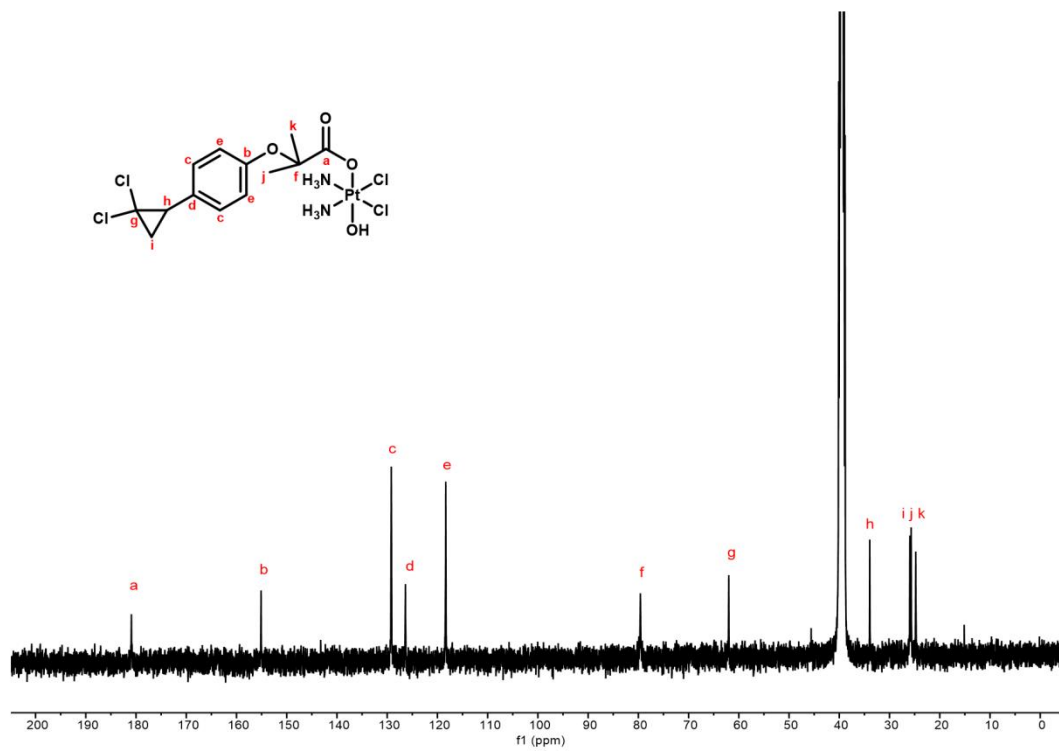

Fig. S10.  $^{13}\text{C}$ -NMR spectrum of compound **3** in  $\text{DMSO-}d_6$ .

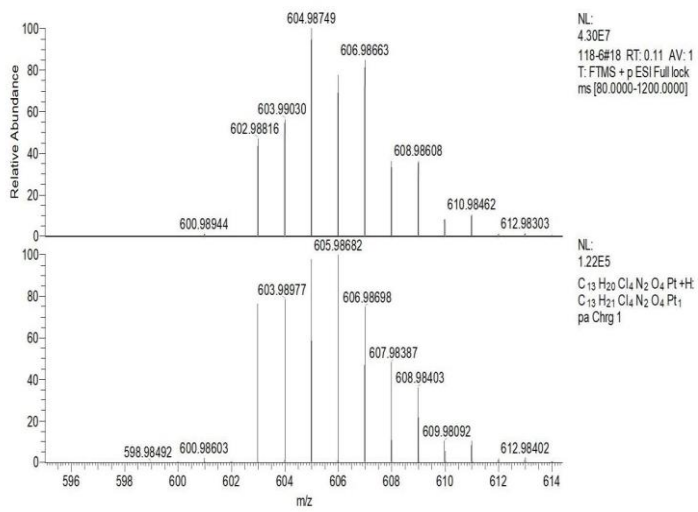

Fig. S11. HR-MS spectrum of compound 3.

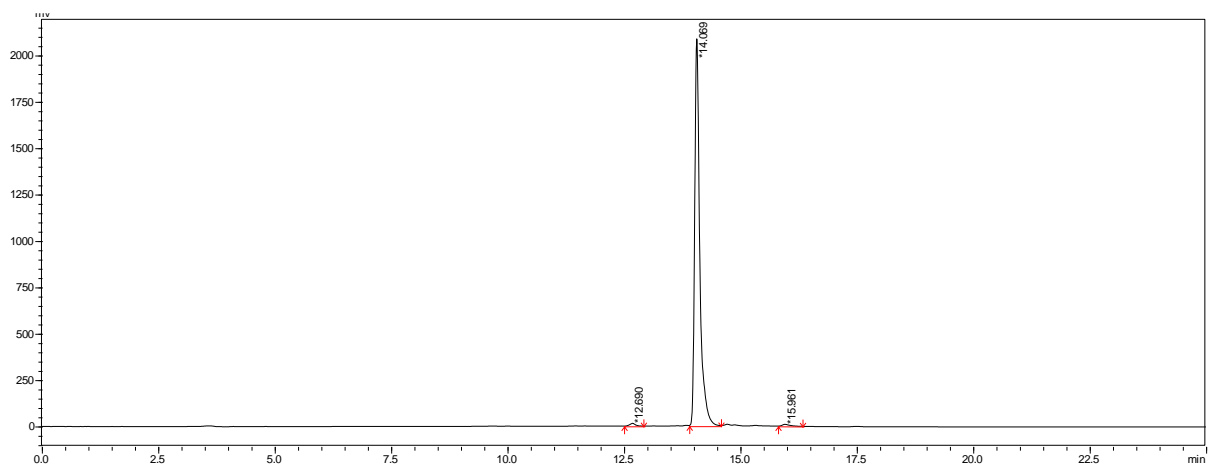

|              | <b>Retention</b> | <b>Peak area</b> | <b>Concentration</b> |
|--------------|------------------|------------------|----------------------|
| <b>1</b>     | <b>12.690</b>    | <b>122730</b>    | <b>0.756</b>         |
| <b>2</b>     | <b>14.069</b>    | <b>15990395</b>  | <b>98.563</b>        |
| <b>3</b>     | <b>15.961</b>    | <b>110391</b>    | <b>0.680</b>         |
| <b>Total</b> |                  | <b>16223516</b>  | <b>100.000</b>       |

Fig. S12. Reverse-phase HPLC trace of compound 3.

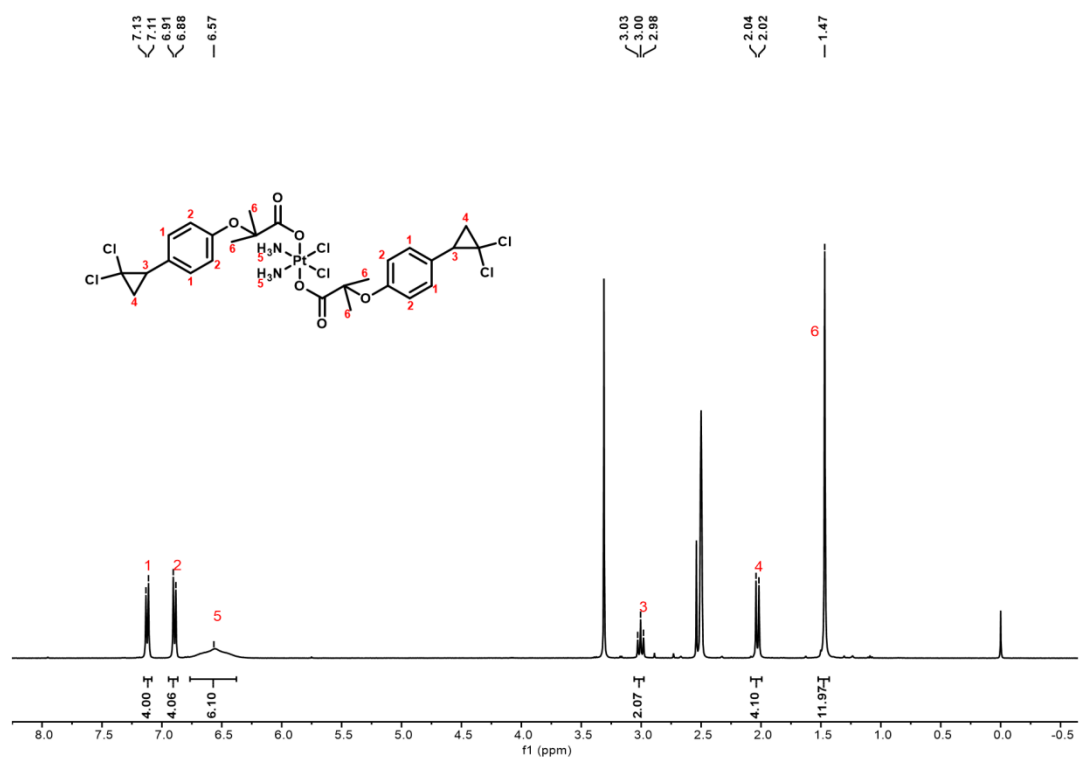

Fig. S13.  $^1\text{H-NMR}$  spectrum of compound **4** in  $\text{DMSO-}d_6$ .

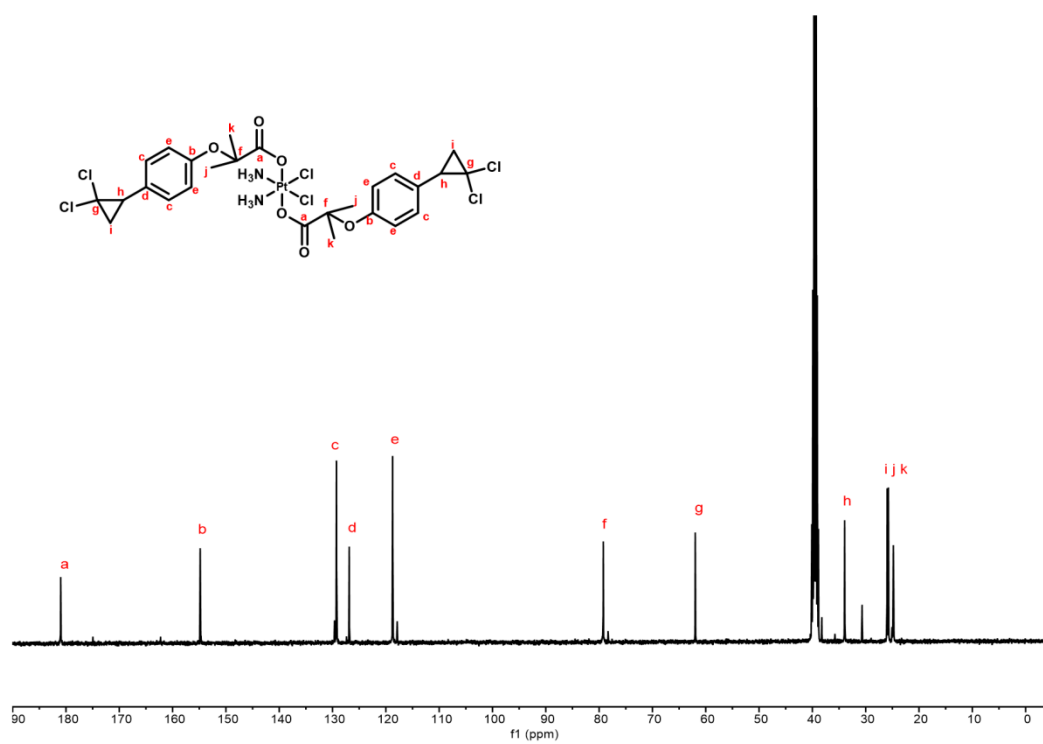

Fig. S14.  $^{13}\text{C}$ -NMR spectrum of compound 4 in  $\text{DMSO-}d_6$ .



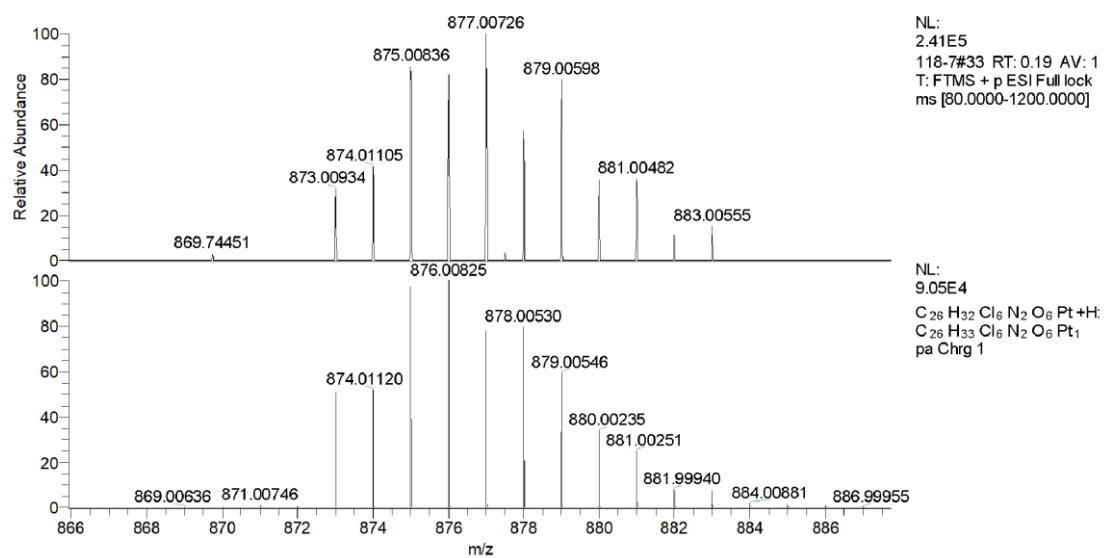

Fig. S15. HR-MS spectrum of compound 4.

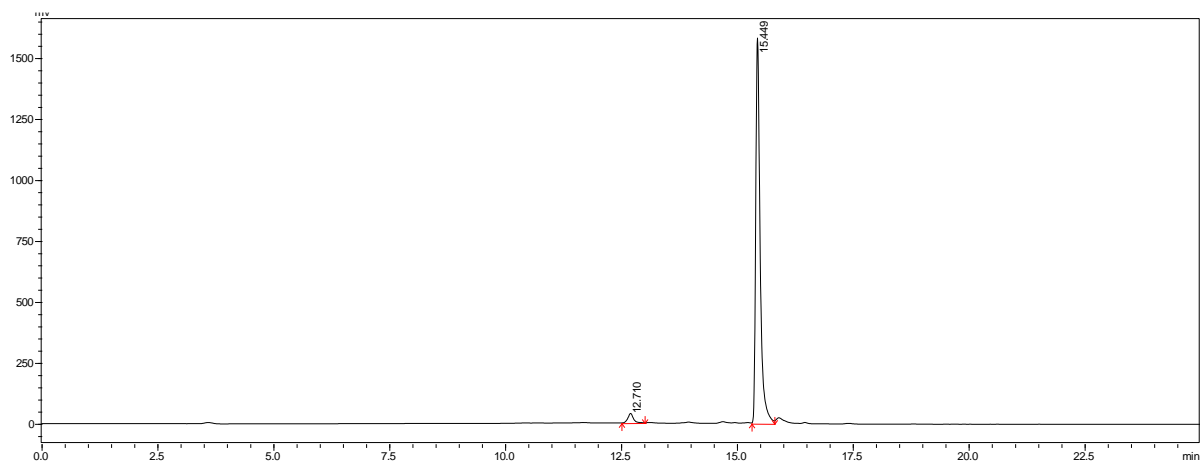

|              | <b>Retention</b> | <b>Peak area</b> | <b>Concentration</b> |
|--------------|------------------|------------------|----------------------|
| <b>1</b>     | <b>12.710</b>    | <b>313928</b>    | <b>2.902</b>         |
| <b>2</b>     | <b>15.4449</b>   | <b>10501909</b>  | <b>97.098</b>        |
| <b>Total</b> |                  | <b>10815836</b>  | <b>100.000</b>       |

Fig. S16. Reverse-phase HPLC trace of compound 4.

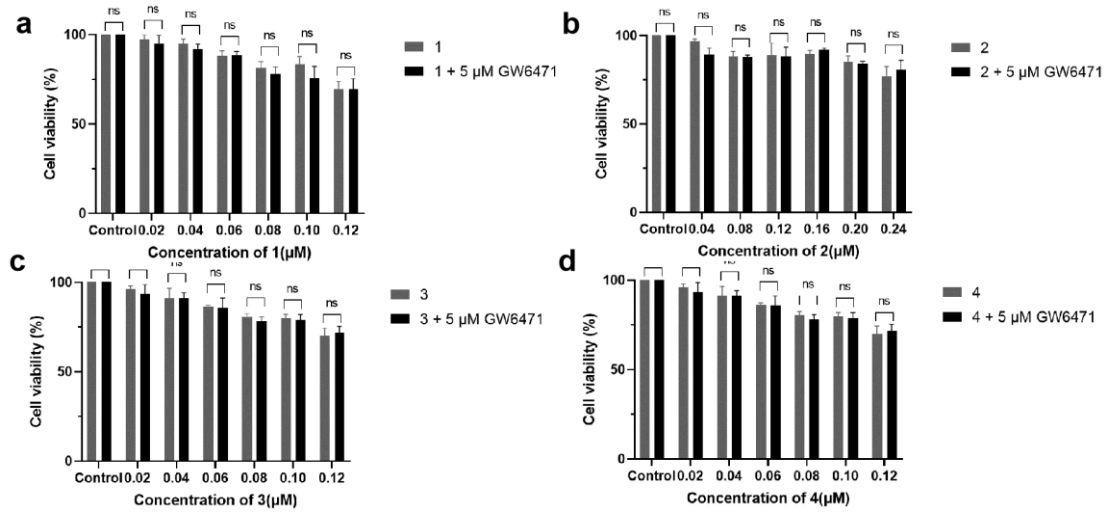

Fig. S17. Comparison of cell viability of A549 cells treated with different concentrations of compounds for 48 h.

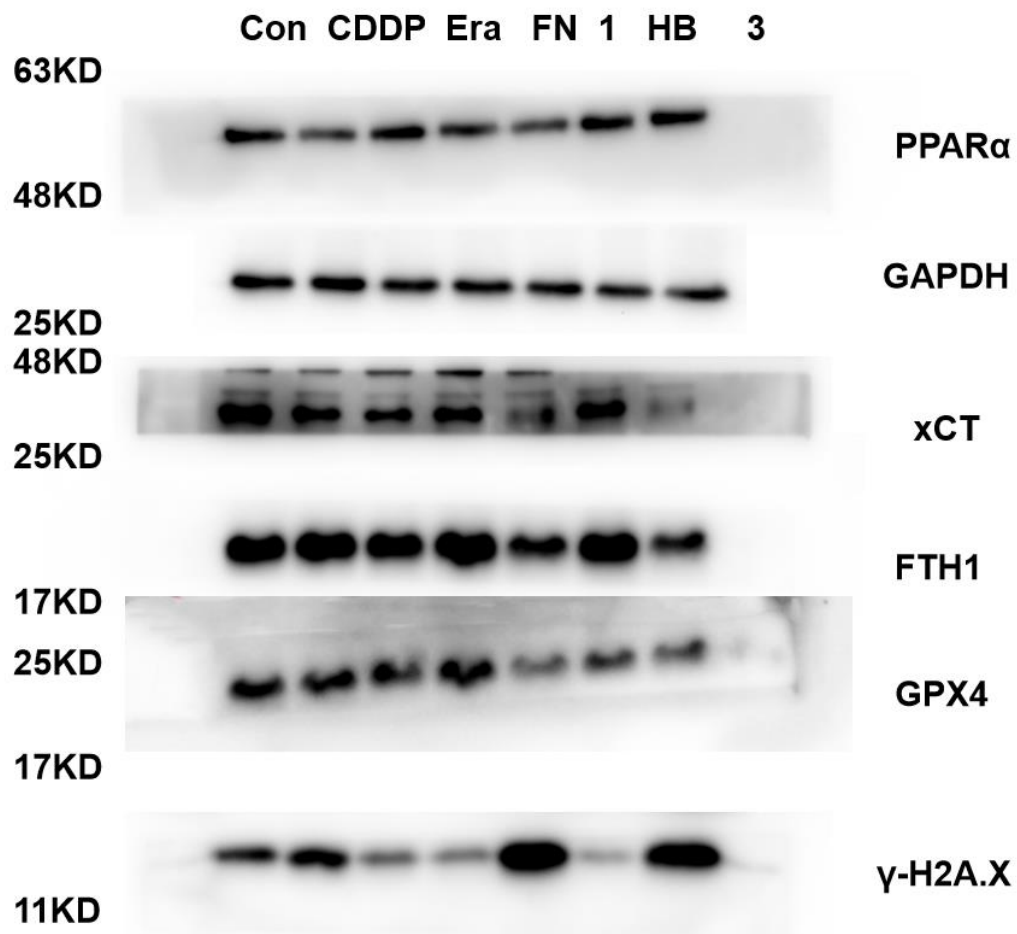

Fig. S18. Un-cropped western blotting images of Figure 8a.

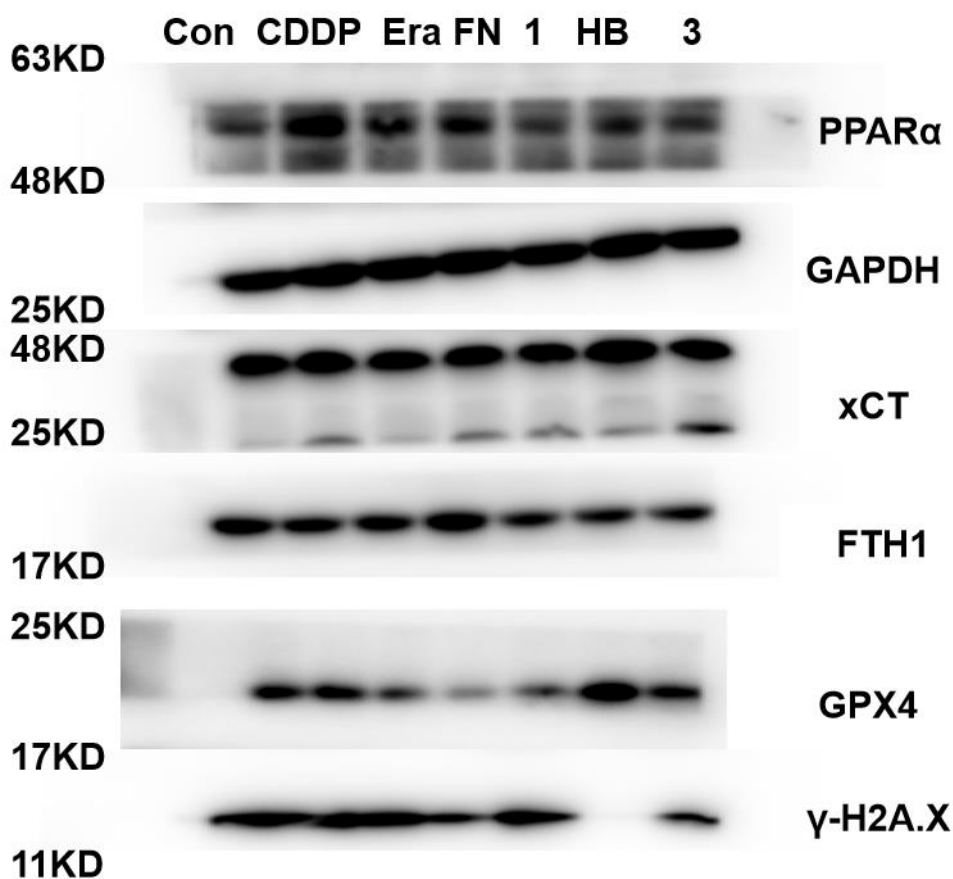

Fig. S19. Un-cropped western blotting images of Figure 8c.

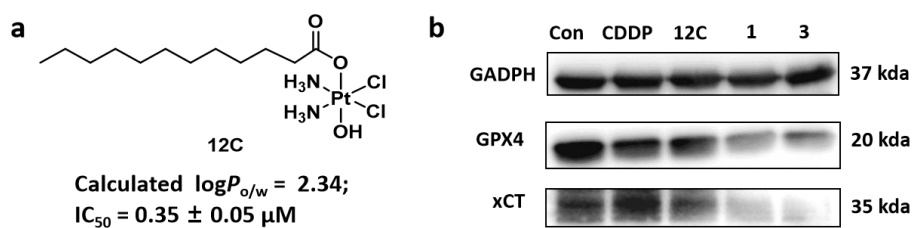

Fig. S20. (a) Chemical structure of compound **12C**. (b) Protein expression of A549 cells treated with 5  $\mu M$  platinum compounds for 24 h.
